# Supplementary material for: Circulating Exosomal Integrin β3 Is Associated with Intracranial Failure and Survival in Lung Cancer Patients Receiving Cranial Irradiation for Brain Metastases: A Prospective Observational Study
Source: PubMed Central journal article supplement (PMC7864205; doi:10.3390/cancers13030380), 2021-01-20
Supplement: cancers-13-00380-s001.pdf [file cancers-13-00380-s001.pdf]

Supplementary Materials

# Circulating Exosomal Integrin $\beta 3$ Is Associated with Intracranial Failure and Survival in Lung Cancer Patients Receiving Cranial Irradiation for Brain Metastases: A Prospective Observational Study

Guann-Yiing Chen, Jason Chia-Hsien Cheng, Ya-Fang Chen, James Chih-Hsin Yang and Feng-Ming Hsu \*

**Table S1.** Clinical factors associated with intracranial progression-free survival and extracranial progression-free survival.

|                   |         | Median IC-PFS<br>(month) | 95% CI   | p-value | Median EC-PFS<br>(month) | 95% CI   | p-Value |
|-------------------|---------|--------------------------|----------|---------|--------------------------|----------|---------|
| Sex               | Male    | 8.0                      | 4.2–9.3  | 0.11    | 4.8                      | 3.0–9.1  | 0.22    |
|                   | Female  | 7.9                      | 6.3–19.8 |         | 5.7                      | 3.7–10.9 |         |
| Number of BM      | <5      | 8.6                      | 5.2–NA   | 0.93    | 5.8                      | 2.4–NA   | 0.86    |
|                   | 5–10    | 7.2                      | 4.2–NA   |         | 3.7                      | 2.8–12.1 |         |
|                   | >10     | 7.9                      | 5.1–13.7 |         | 5.0                      | 3.5–9.3  |         |
| LM carcinomatosis | Present | 7.4                      | 4.1–9.3  | 0.93    | 5.0                      | 3.1–9.1  | 0.12    |
|                   | Absent  | 7.9                      | 5.2–11.9 |         | 4.4                      | 2.7–9.5  |         |
| Histology         | ADC     | 8.0                      | 7.4–11.7 | 0.002   | 5.6                      | 4.8–9.3  | 0.02    |
|                   | Non-ADC | 3.5                      | 2.4–NA   |         | 2.4                      | 1.8–NA   |         |
| GPA score         | 0–1.0   | 3.6                      | 3.2–NA   | 0.002   | 3.3                      | 2.8–NA   | 0.11    |
|                   | 1.5–2.0 | 8.0                      | 5.0–13.7 |         | 4.8                      | 2.7–9.1  |         |
|                   | 2.5–3.0 | 9.1                      | 7.9–31.3 |         | 5.8                      | 5.6–14.3 |         |
|                   | 3.5–4.0 | 19.8                     | 9.3–NA   |         | Not reached              | 1.4–NA   |         |

Abbreviations: IC-PFS, intracranial progression-free survival; CI, confidence interval; EC-PFS, extracranial progression-free survival; BM, brain metastases; LM, leptomeningeal; ADC, adenocarcinoma; GPA; graded prognostic assessment.

**Table S2.** Univariate Cox regression analysis of factors associated with overall survival.

|                                                      | <b>HR</b> | <b>95% CI</b> | <b>p-Value</b> |
|------------------------------------------------------|-----------|---------------|----------------|
| Age (per 1-year increase)                            | 1.03      | 0.99–1.07     | 0.12           |
| Sex (female vs. male)                                | 0.62      | 0.33–1.16     | 0.14           |
| Histology<br>(adenocarcinoma vs. non-adenocarcinoma) | 0.36      | 0.18–0.73     | 0.004          |
| Prior SRS (yes vs. no)                               | 0.98      | 0.81–1.19     | 0.88           |
| Number of BM (<5, 5–10, >10)                         | 0.99      | 0.70–1.40     | 0.94           |
| High GPA (high vs. low)                              | 0.26      | 0.14–0.48     | <0.001         |
| Integrin $\beta$ 3 (per 1 ng/mL increase)            | 1.15      | 1.005–1.32    | 0.04           |
| Integrin $\beta$ 6 (per 1 ng/mL increase)            | 1.06      | 0.87–1.29     | 0.56           |

Abbreviations: HR, hazard ratio; CI, confidence interval; vs., versus; SRS, stereotactic radiosurgery; BM, brain metastases; GPA; graded prognostic assessment.

**Table S3.** Univariate subdistribution hazards for factors associated with intracranial failure with death as competing risk.

|                                                      | <b>sHR</b> | <b>95% CI</b> | <b>p-Value</b> |
|------------------------------------------------------|------------|---------------|----------------|
| Age (per 1-year increase)                            | 1.01       | 0.97–1.06     | 0.54           |
| Sex (female vs. male)                                | 1.1        | 0.59–2.05     | 0.76           |
| Histology<br>(adenocarcinoma vs. non-adenocarcinoma) | 1.26       | 0.48–3.32     | 0.64           |
| Prior SRS (yes vs. no)                               | 1.04       | 0.99–1.08     | 0.12           |
| Number of BM (<5, 5–10, >10)                         | 1.05       | 0.72–1.55     | 0.8            |
| High GPA (high vs. low)                              | 1.56       | 0.71–3.42     | 0.27           |
| Integrin $\beta$ 3 (per 1 ng/mL increase)            | 1.16       | 0.995–1.34    | 0.058          |
| Integrin $\beta$ 6 (per 1 ng/mL increase)            | 0.995      | 0.79–1.25     | 0.96           |

Abbreviations: sHR, subdistribution hazard ratio; CI, confidence interval; vs., versus; SRS, stereotactic radiosurgery; BM, brain metastases; GPA; graded prognostic assessment.
